# Supplementary material for: Evaluating methods for ranking differentially expressed genes applied to microArray quality control data
Source: Springer Nature journal article supplement (doi:10.1186/1471-2105-12-227), 2011-06-06

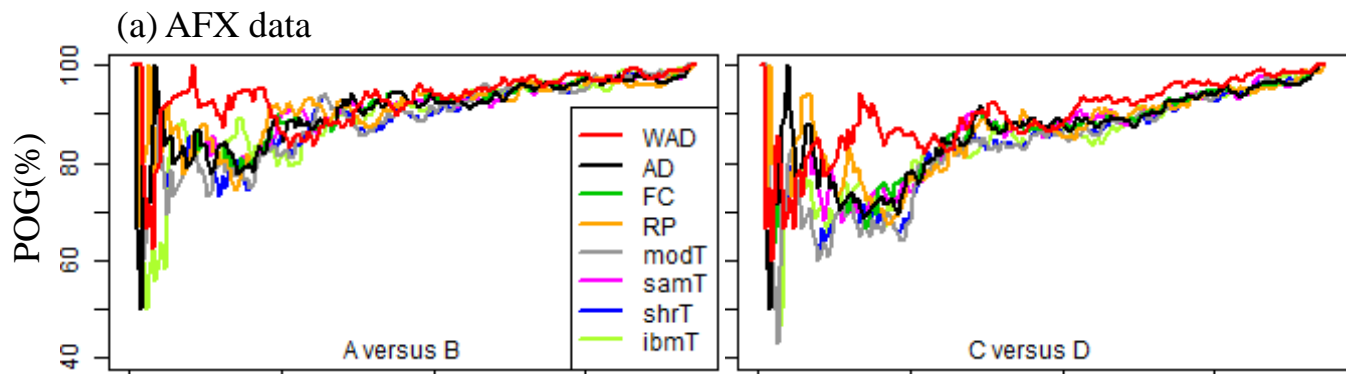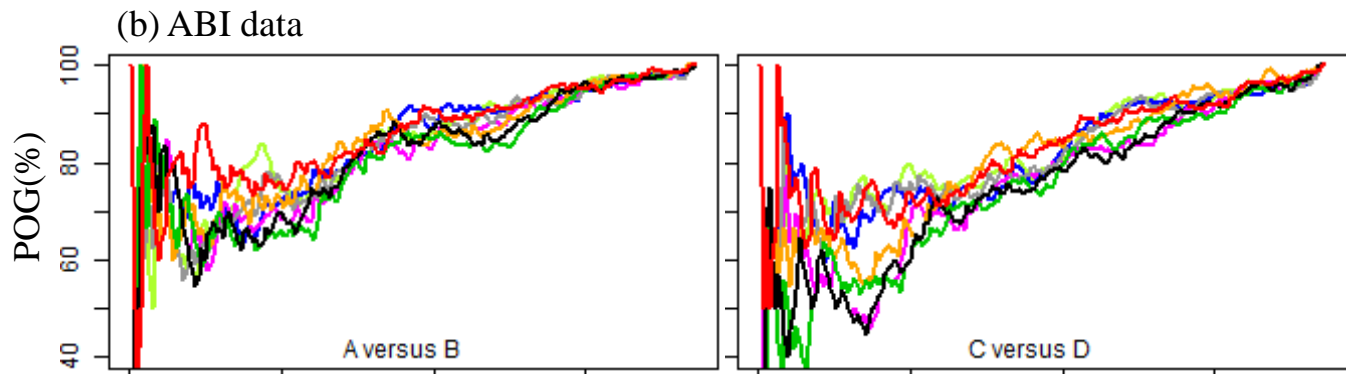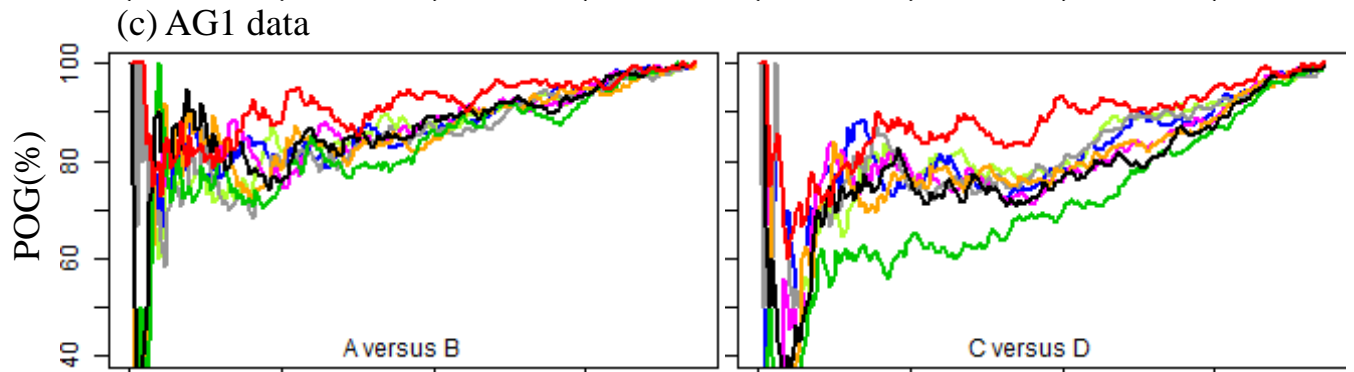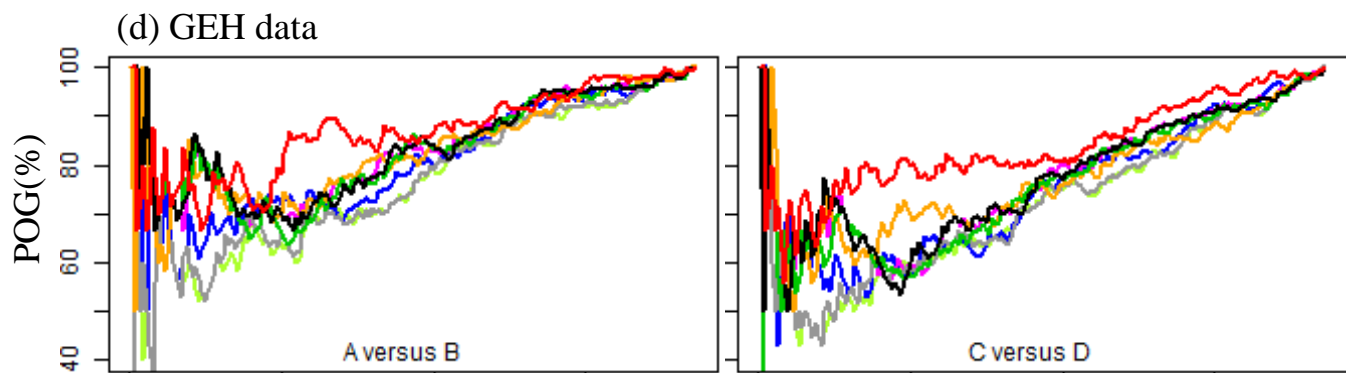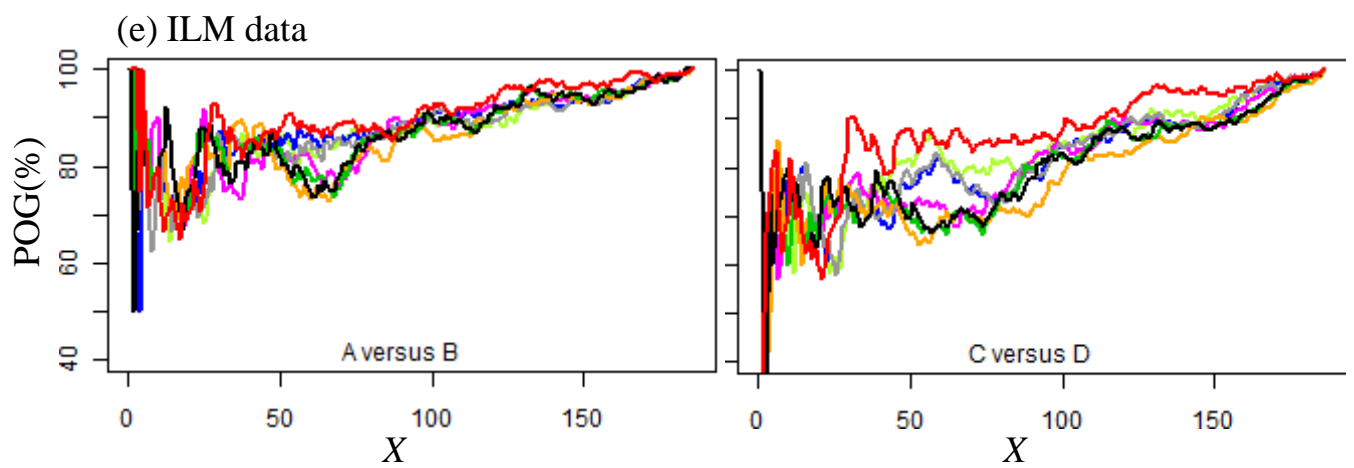

Supplement: 12859_2010_4605_MOESM20_ESM.pdf [file 12859_2010_4605_MOESM20_ESM.pdf]
